# Supplementary material
Source: publisher figshare collection journal article supplement (https://frontiersin.figshare.com/ndownloader/files/24550577)
Supplement: Supplementary file [file 24550577]

# Supplementary Material

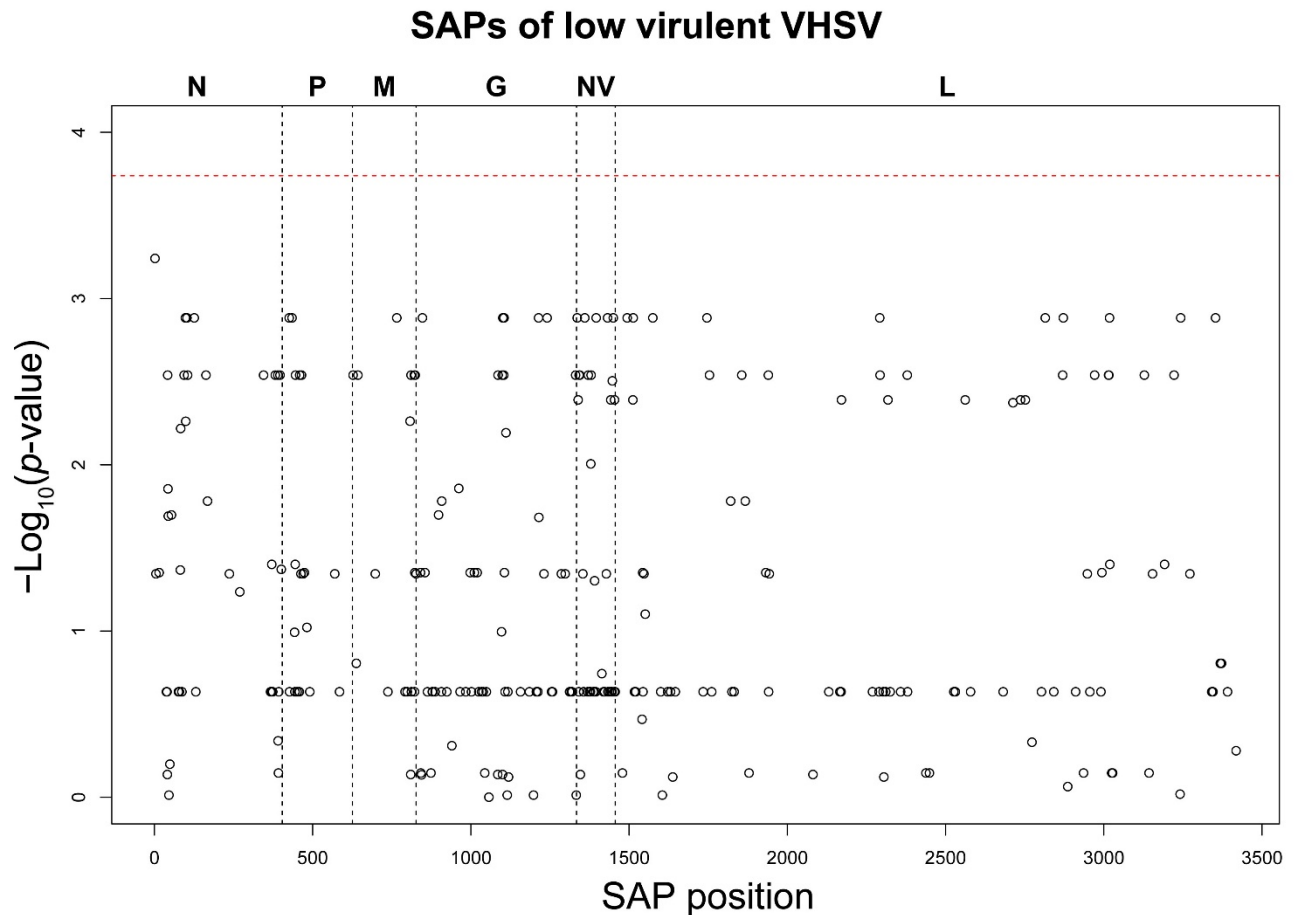

**Supplementary Figure 2. Manhattan plot of the association analysis conducted on low virulent isolates SAPs and the trait “virulence”.** The SAP position along the genome coding regions is displayed on the  $x$ -axis, while the  $y$ -axis reports the negative logarithm of the association  $p$ -value. The red dashed line identifies the association test significance limit. As shown, no SAP was significant associated with virulence in this dataset.
